# Supplementary material
Source: PubMed Central journal article supplement (PMC4121360)
Supplement: epi-9-492-s02.pdf [file epi-9-492-s02.pdf]

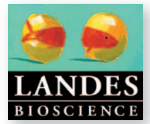

## **Supplemental Material to:**

**Andrew M Kaz, Chao-Jen Wong, Slavomir Dzieciatkowski,  
Yanxin Luo, Robert E Schoen, and William M Grady**

**Patterns of DNA methylation in the normal colon vary by  
anatomical location, gender, and age**

**Epigenetics 2014; 9(4)**

**<http://dx.doi.org/10.4161/epi.27650>**

**[http://www.landesbioscience.com/journals/epigenetics/  
article/27650/](http://www.landesbioscience.com/journals/epigenetics/article/27650/)**

# Supplemental Figure 1

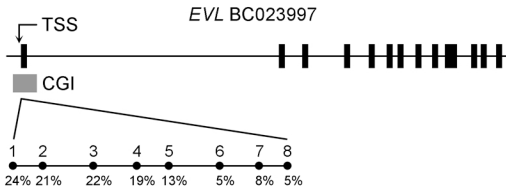

# B3GNT7 (GeneID: 93010)

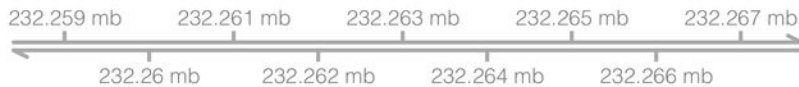

## Supplemental Figure 2

CpG Island

Gene Model

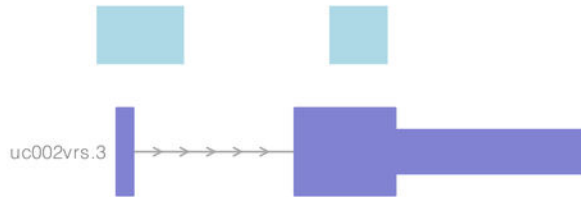

Methylation Profile

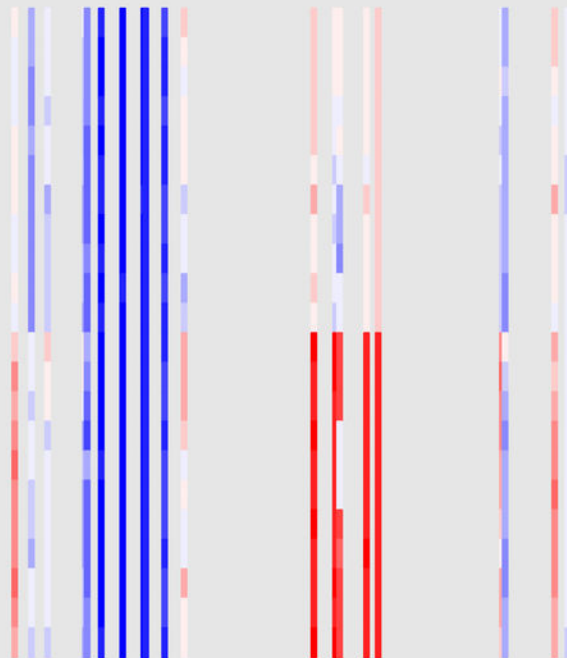

RS11-117-R  
RS11-088-R  
RS11-091-R  
RS11-106-R  
RS11-090-R  
RS12-056-R  
RS11-092-R  
RS11-111-R  
RS11-104-R  
RS11-105-R  
RS11-089-R  
RS12-056-A  
RS11-091-A  
RS11-090-A  
RS12-048-A  
RS11-104-A  
RS11-092-A  
RS11-105-A  
RS11-088-A  
RS11-117-A  
RS11-106-A  
RS11-089-A

Methylation  
(Beta value)

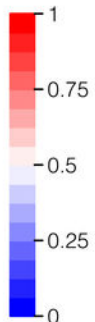

**Supplemental Table 1.** Primer sequences and annealing temperatures used in pyrosequencing

| Gene/Element  | Primer | Sequence                  | Location | Annealing temp (°C) |
|---------------|--------|---------------------------|----------|---------------------|
| LINE-1        | F      | TTTTGAGTTAGGTGTGGGATATA   |          | 56                  |
|               | R      | AAAATCAAAAAATTCCTTTC      |          |                     |
|               | S      | AGTTAGGTGTGGGATATAGT      |          |                     |
| SAT- $\alpha$ | F      | AGAGTAGGTTTTTGTATGGAGTAT  |          | 56                  |
|               | R      | ACTTCACCCAAAAAATATTCAACT  |          |                     |
|               | S      | ATATTGGGATTTTTTGTAGAA     |          |                     |
| <i>EVL</i>    | F      | GGGGTTAGGAGGGGATTGGA      | +95      | 56                  |
|               | R      | TCTCAACACAACAACCAAAAACTA  |          |                     |
|               | S      | AGGAGGGGATTGGAGGA         |          |                     |
| <i>MGMT</i>   | F      | GGGGAAAGGTGGGTAATAT       | +236     | 56                  |
|               | R      | CCCCAATATACTAAAACAACCC    |          |                     |
|               | S      | GGGAGAGAGGAGATTTAGATATTTA |          |                     |
| <i>CDKN2A</i> | F      | GGTTGAGGAGAGGGGGAGA       | +167     | 56                  |
|               | R      | CCTAATTCCAATTCCCCTACAACTT |          |                     |
|               | S      | CCCCCCCCTCCAACA           |          |                     |
| <i>ESR1</i>   | F      | GGGTAGGGTAGGGGTTAGAG      | +210     | 56                  |
|               | R      | ATCCCCCAAAACAAAAAATCTAAA  |          |                     |
|               | S      | GGGTAGGGGTTAGAGT          |          |                     |

The primer sequences and associated annealing temperatures used in the pyrosequencing reactions are listed. F indicates forward primer; R reverse primer; S sequencing primer. 'Location' refers to the start of the region amplified with respect to the transcription start site (TSS) (e.g. '+95' means 95 nucleotides downstream from the TSS).
